# Supplementary material for: Long-term outcomes in patients with PET-predicted poor-responsive HER2-positive breast cancer treated with neoadjuvant bevacizumab added to trastuzumab and docetaxel: 5-year follow-up of the randomised Avataxher study
Source: PubMed Central journal article supplement — eClinicalMedicine. 2020 Nov 4;28:100566. doi: 10.1016/j.eclinm.2020.100566 (PMC7649610; doi:10.1016/j.eclinm.2020.100566), 2020-11-04
Supplement: mmc1.pdf [file mmc1.pdf]

## Supplementary materials

**Supplementary Table 1. Sensitivity analysis of DFS using alternative censoring methods (ITT population).**

|                                        | <b>PET responders</b> | <b>Group A</b>    | <b>Group B</b>    |
|----------------------------------------|-----------------------|-------------------|-------------------|
|                                        | <b>(N=69)</b>         | <b>(N=48)</b>     | <b>(N=25)</b>     |
| <b>DFS</b>                             |                       |                   |                   |
| Number of events, n (%)                | 13 (18.8%)            | 12 (25.0%)        | 6 (24.0%)         |
| Number of censored observations, n (%) | 56 (81.2%)            | 36 (75.0%)        | 19 (76.0%)        |
| Median DFS, months (95% CI)            | NE (NE, NE)           | NE (NE, NE)       | NE (NE, NE)       |
| 5-year DFS rate, % (95% CI)*           | 82.4 (71.1, 89.6)     | 74.8 (59.9, 84.9) | 76.0 (54.2, 88.4) |

*In this sensitivity analysis of DFS, patients who discontinued the study early for any reason were considered to be treatment failures.*

*\* Derived from Kaplan-Meier estimates. NE, not evaluable.*

**Supplementary Figure 1. Kaplan-Meier curves for DFS events using alternative censoring methods.**

Y axis of the figure has been expanded.

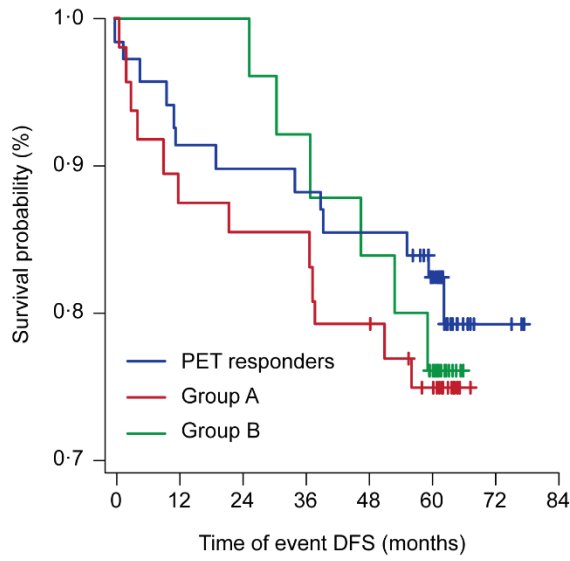

**Number at risk**

|                | 0  | 12 | 24 | 36 | 48 | 60 | 72 | 84 |
|----------------|----|----|----|----|----|----|----|----|
| PET responders | 69 | 63 | 62 | 61 | 59 | 48 | 3  | 0  |
| Group A        | 48 | 42 | 41 | 41 | 38 | 31 | 0  | 0  |
| Group B        | 25 | 25 | 25 | 23 | 21 | 17 | 0  | 0  |

*In this sensitivity analysis of DFS, patients who discontinued the study early for any reason were considered to be treatment failures.*
